# Supplementary material for: Adipokines and Incident Type 2 Diabetes in an Aboriginal Canadian Population
Source: Oxford University Press journal article supplement (doi:10.2337/dc08-0036), 2008-06-07
Supplement: dc080036onlineappendix.doc [file dc080036onlineappendix.doc]

Online appendix

Table 1-Spearman correlation coefficients of adipokines to metabolic measurements and to other adipokines, adjusted for age and sex at baseline (n=456): The Sandy Lake Health and Diabetes Project

|  | Adiponectin | Leptin | CRP | IL-6 | SAA | A/L |
| --- | --- | --- | --- | --- | --- | --- |
| Adiponectin | 1.00 |  |  |  |  |  |
| Leptin | -0.26* | 1.00 |  |  |  |  |
| CRP | -0.25* | 0.46*† | 1.00 |  |  |  |
| IL-6 | -0.16* | 0.27* | 0.40*† | 1.00 |  |  |
| SAA | -0.05 | 0.25* | 0.55*† | 0.39*† | 1.00 |  |
| A/L | 0.69*† | -0.86*† | -0.47*† | -0.29* | -0.22* | 1.00 |
| BMI | -0.36*† | 0.75*† | 0.43*† | 0.18* | 0.20* | -0.73*† |
| % body fat | -0.37*† | 0.77*† | 0.45*† | 0.18* | 0.25* | -0.75*† |
| WC | -0.32*† | 0.73*† | 0.43*† | 0.20* | 0.19* | -0.70*† |
| Systolic BP | 0.06 | 0.30*† | 0.12* | 0.14* | 0.13* | -0.20* |
| Diastolic BP | -0.04 | 0.24* | 0.16* | 0.10* | 0.07 | -0.20* |
| HDL-C | 0.39*† | -0.25* | -0.19* | -0.13* | -0.02 | 0.39*† |
| LDL-C | -0.16* | 0.33*† | 0.10* | 0.12* | -0.04 | -0.31*† |
| Triglyceride | -0.33*† | 0.40*† | 0.18* | 0.15* | 0.03 | -0.47*† |
| Fasting glucose | -0.11* | 0.26* | 0.15* | 0.06 | 0.13* | -0.25* |
| 2-h glucose | -0.22* | 0.28* | 0.27* | 0.21* | 0.15* | -0.30*† |
| Fasting insulin | -0.29* | 0.62*† | 0.35*† | 0.20* | 0.25* | -0.61*† |

Abbreviations: CRP, C-reactive protein; IL-6, interleukin 6; SAA, serum amyloid A; A/L, adiponectin-to-leptin ratio; WC, iliac crest waist circumference; BP, Blood Pressure *Correlation coefficients indicate p<0.05. †correlation coefficients are ≥0.3 or ≤-0.3.
